# Supplementary material for: Using Augmented Reality in K-12 Education: An Indicative Platform for Teaching Physics
Source: MDPI journal article supplement (doi:10.3390/info13070336), 2022-07-12
Supplement: s1 [file s1]

## Supplementary Materials

*AR application for the 5th grade of primary school*

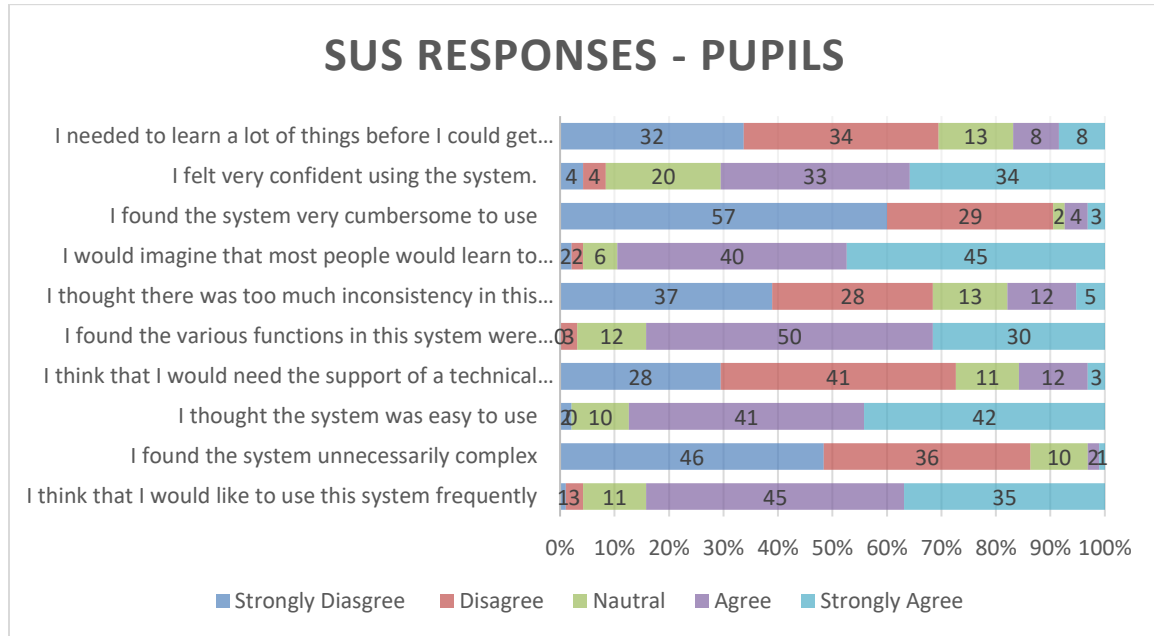

**Figure S1.** Pupils Responses

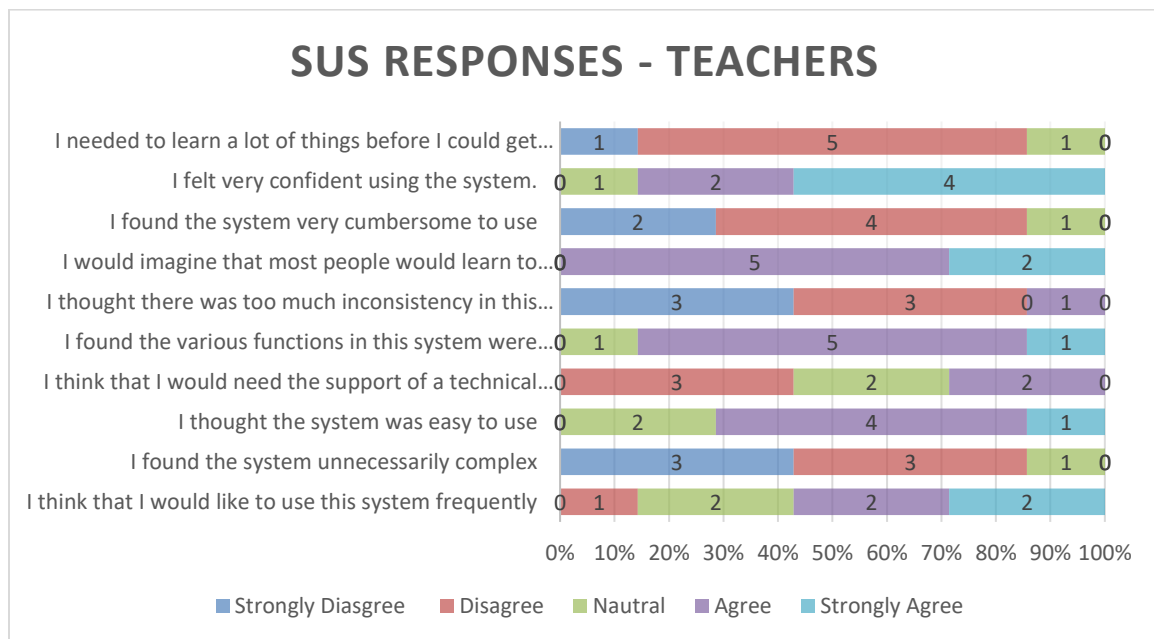

**Figure S2.** Teachers Responses

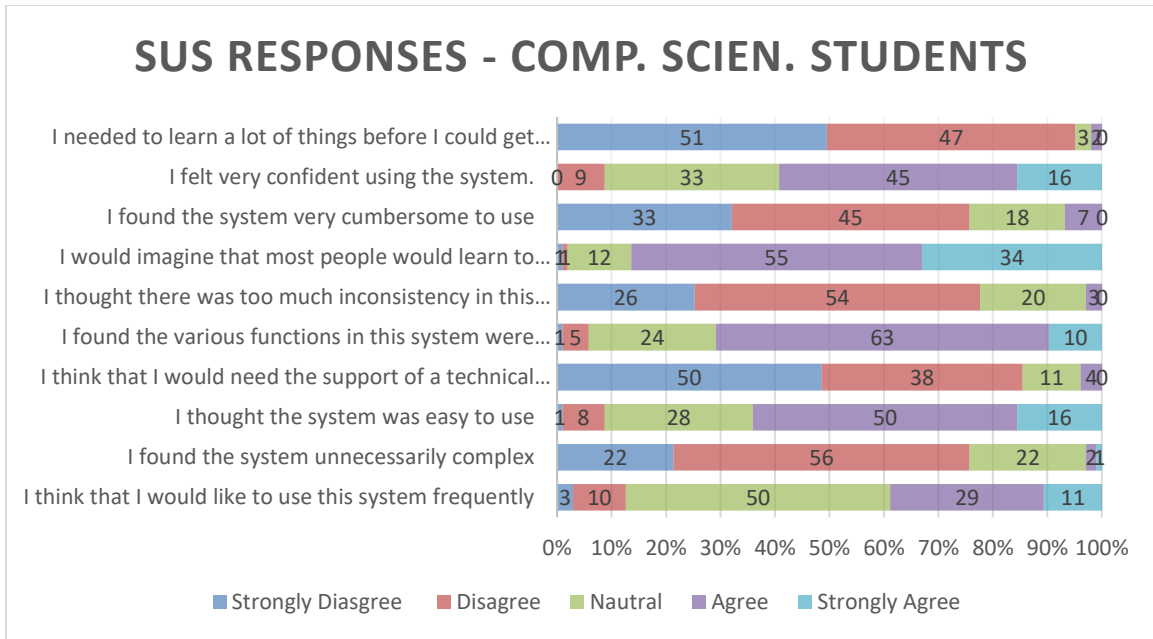

**Figure S3.** Computer Science Students

*AR application for the 6th grade of primary school*

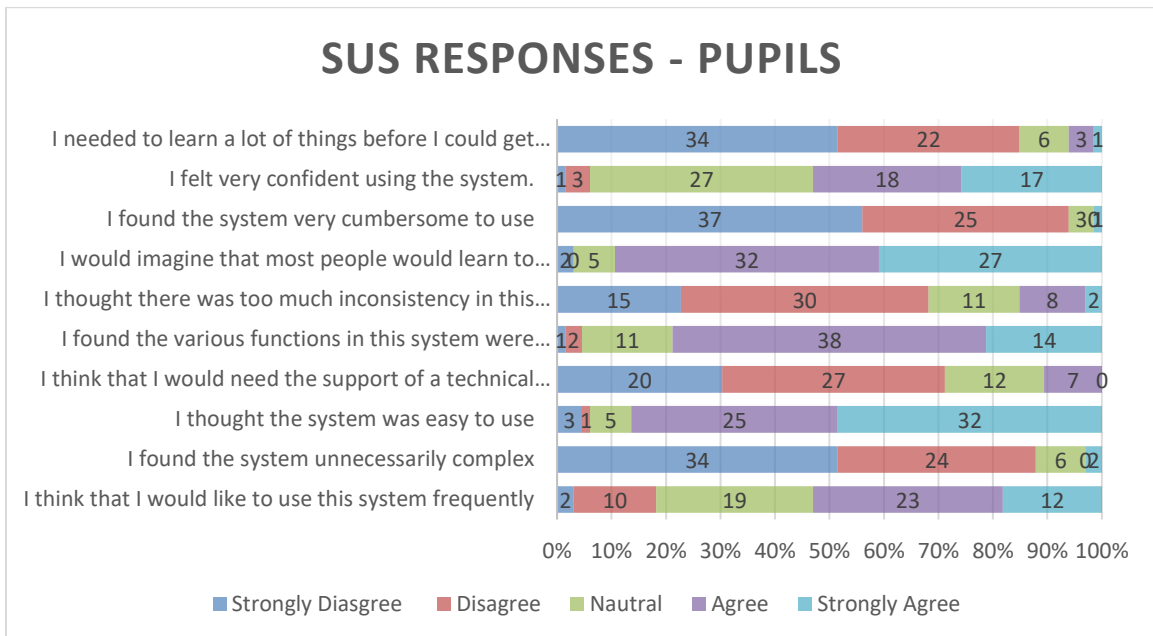

**Figure S4.** Pupils Responses

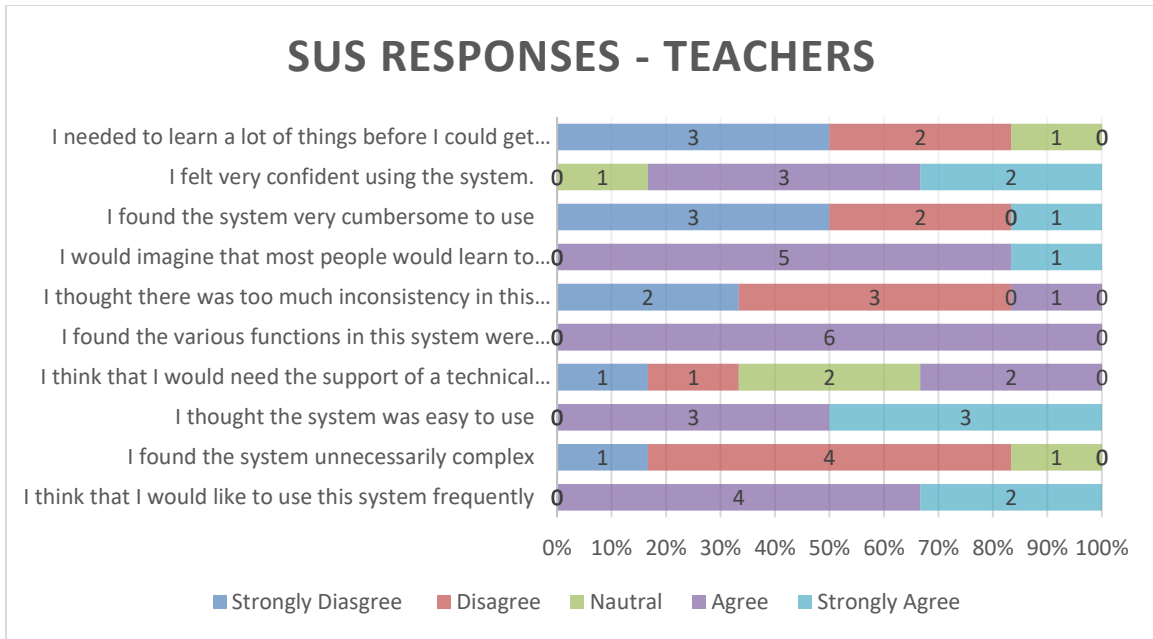

**Figure S5.** Teachers Responses

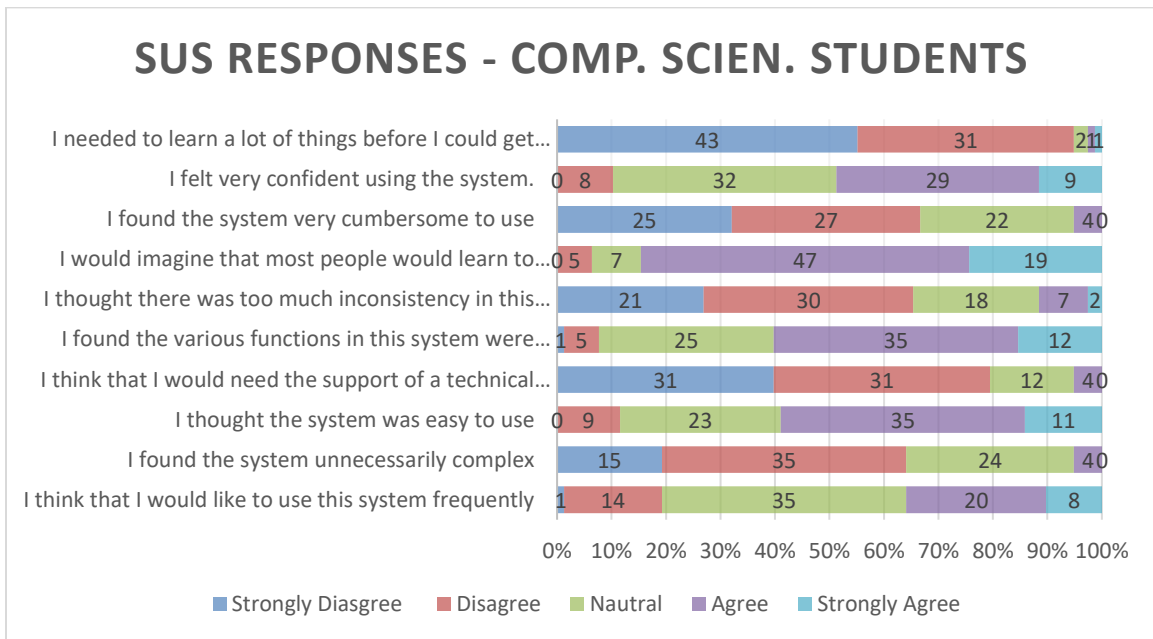

**Figure S6.** Computer Science Students

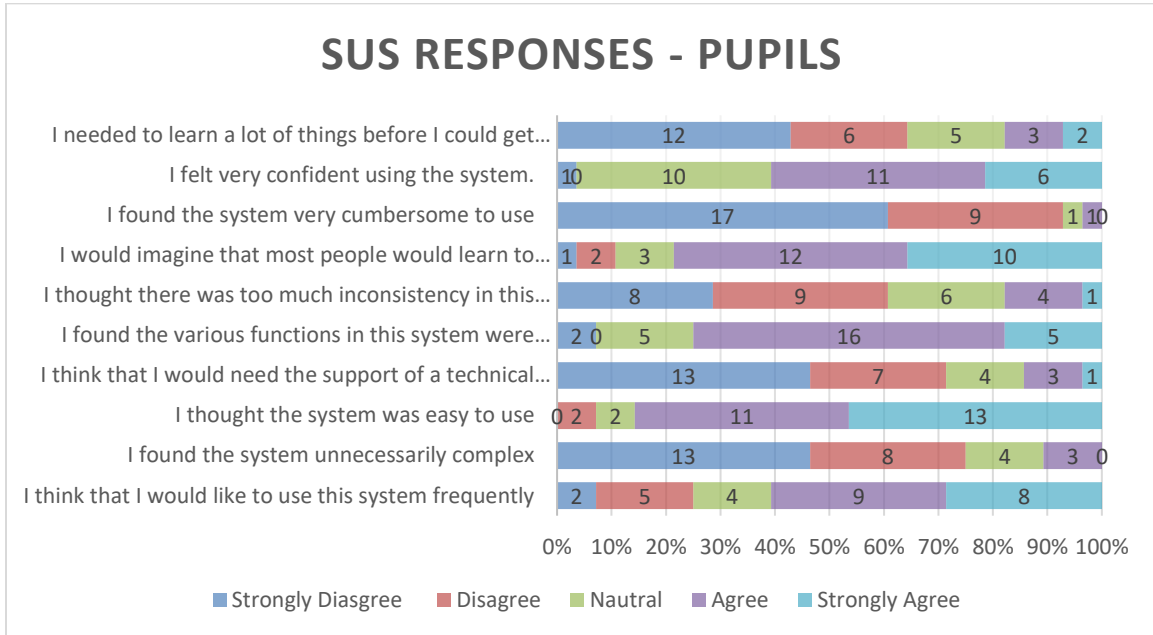

Figure S7. Pupils Responses

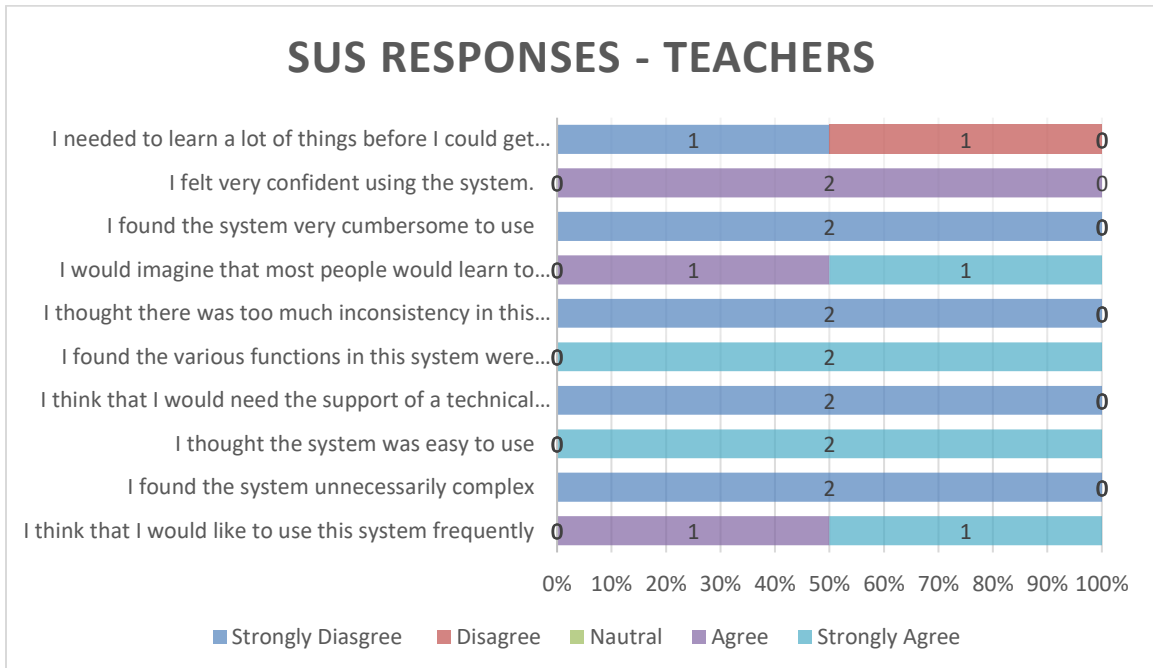

Figure S8. Teachers Responses

## SUS RESPONSES - COMP. SCIEN. STUDENTS

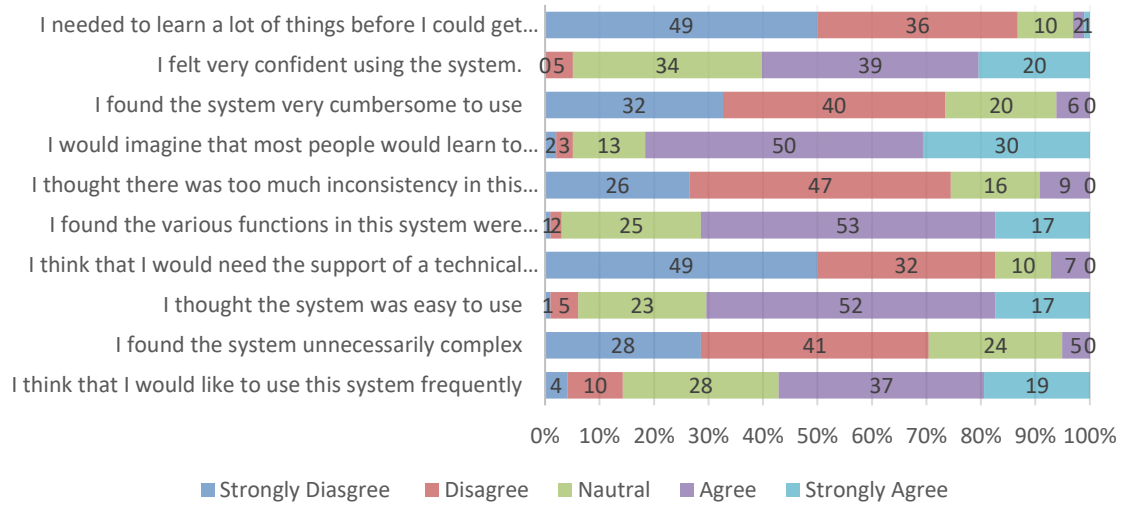

**Figure S9.** Computer Science Students
